# Supplementary material for: Hsa_circ_0009096/miR-370-3p modulates hepatic stellate cell proliferation and fibrosis during biliary atresia pathogenesis
Source: PeerJ. 2024 May 14;12:e17356. doi: 10.7717/peerj.17356 (PMC11100479; doi:10.7717/peerj.17356)
Supplement: Supplemental Information 1 [file peerj-12-17356-s001.xls]

## Sheet: Sheet1
ITEM TO CHECK	IMPORTANCE	CHECKLIST
EXPERIMENTAL DESIGN
Definition of experimental and control groups	E	page 5, line 118-120;page 6, line 124-135
Number within each group	E	page 7, line 152
Assay carried out by core lab or investigator's lab?	D	NA
Acknowledgement of authors' contributions	D	NA
SAMPLE
Description	E	NA
Volume/mass of sample processed	D	NA
Microdissection or macrodissection	E	NA
Processing procedure	E	NA
If frozen - how and how quickly?	E	NA
If fixed - with what, how quickly?	E	NA
Sample storage conditions and duration (especially for FFPE samples)	E	NA
NUCLEIC ACID EXTRACTION
Procedure and/or instrumentation	E	NA
Name of kit and details of any modifications	E	page 6, line 140-141
Source of additional reagents used	D	NA
Details of DNase or RNAse treatment	E	page 6, line 141-142
Contamination assessment (DNA or RNA)	E	page 6, line 143-144
Nucleic acid quantification	E	page 6, line 144-145
Instrument and method	E	page 6, line 144-145
Purity (A260/A280)	D	page 6, line 144-145
Yield	D	page 6, line 144-145
RNA integrity method/instrument	E	NA
RIN/RQI or Cq of 3' and 5' transcripts	E	NA
Electrophoresis traces	D	NA
Inhibition testing (Cq dilutions, spike or other)	E	NA
REVERSE TRANSCRIPTION
Complete reaction conditions	E	page 6, line 145-147
Amount of RNA and reaction volume	E	page 6, line 145-147
Priming oligonucleotide (if using GSP) and concentration	E	page 6, line 145-147
Reverse transcriptase and concentration	E	page 6, line 145-147
Temperature and time	E	page 6, line 145-147
Manufacturer of reagents and catalogue numbers	D	page 6, line 145-147
Cqs with and without RT	D*	NA
Storage conditions of cDNA	D	page 6, line 147-148
qPCR TARGET INFORMATION
If multiplex, efficiency and LOD of each assay.	E	NA
Sequence accession number	E	NA
Location of amplicon	D	NA
Amplicon length	E	NA
In silico specificity screen (BLAST, etc)	E	NA
Pseudogenes, retropseudogenes or other homologs?	D	NA
Sequence alignment	D	NA
Secondary structure analysis of amplicon	D	NA
Location of each primer by exon or intron (if applicable)	E	NA
What splice variants are targeted?	E	NA
qPCR OLIGONUCLEOTIDES
Primer sequences	E	page7, line153- 154
RTPrimerDB Identification Number	D	NA
Probe sequences	D**	NA
Location and identity of any modifications	E	NA
Manufacturer of oligonucleotides	D	page7, line 154
Purification method	D	page7, line 154
qPCR PROTOCOL
Complete reaction conditions	E	page6, line 148;page7, line 149-151
Reaction volume and amount of cDNA/DNA	E	page6, line 148;page7, line 149-151
Primer, (probe), Mg++ and dNTP concentrations	E	page6, line 148;page7, line 149-151
Polymerase identity and concentration	E	page6, line 148;page7, line 149-151
Buffer/kit identity and manufacturer	E	page6, line 148;page7, line 149-151
Exact chemical constitution of the buffer	D	page6, line 148;page7, line 149-151
Additives (SYBR Green I, DMSO, etc.)	E	page6, line 148;page7, line 149-151
Manufacturer of plates/tubes and catalog number	D	NA
Complete thermocycling parameters	E	page6, line 148;page7, line 149-151
Reaction setup (manual/robotic)	D	page6, line 148;page7, line 149-151
Manufacturer of qPCR instrument	E	page6, line 148;page7, line 149
qPCR VALIDATION
Evidence of optimisation (from gradients)	D	NA
Specificity (gel, sequence, melt, or digest)	E	NA
For SYBR Green I, Cq of the NTC	E	NA
Standard curves with slope and y-intercept	E	NA
PCR efficiency calculated from slope	E	NA
Confidence interval for PCR efficiency or standard error	D	NA
r2 of standard curve	E	NA
Linear dynamic range	E	NA
Cq variation at lower limit	E	NA
Confidence intervals throughout range	D	NA
Evidence for limit of detection	E	NA
If multiplex, efficiency and LOD of each assay.	E	NA
DATA ANALYSIS
qPCR analysis program (source, version)	E	NA
Cq method determination	E	page7, line 151-152
Outlier identification and disposition	E	NA
Results of NTCs	E	NA
Justification of number and choice of reference genes	E	page7, line 151-152
Description of normalisation method	E	page7, line 151-152
Number and concordance of biological replicates	D	NA
Number and stage (RT or qPCR) of technical replicates	E	page7, line 152-153
Repeatability (intra-assay variation)	E	NA
Reproducibility (inter-assay variation, %CV)	D	NA
Power analysis	D	NA
Statistical methods for result significance	E	NA
Software (source, version)	E	NA
Cq or raw data submission using RDML	D	NA
Table 1. MIQE checklist for authors, reviewers and editors. All essential information (E) must be submitted with the manuscript. Desirable
information (D) should be submitted if available. If using primers obtained from RTPrimerDB, information on qPCR target, oligonucleotides,
protocols and validation is available from that source.
*: Assessing the absence of DNA using a no RT assay is essential when first extracting RNA. Once the sample has been validated as
RDNA-free, inclusion of a no-RT control is desirable, but no longer essential.
**: Disclosure of the probe sequence is highly desirable and strongly encouraged. However, since not all commercial pre-designed assay
vendors provide this information, it cannot be an essential requirement. Use of such assays is advised against.
